# Supplementary material for: petal: Co-expression network modelling in R
Source: PubMed Central journal article supplement (PMC4977474; doi:10.1186/s12918-016-0298-8), 2016-08-01

### Histogram of Data

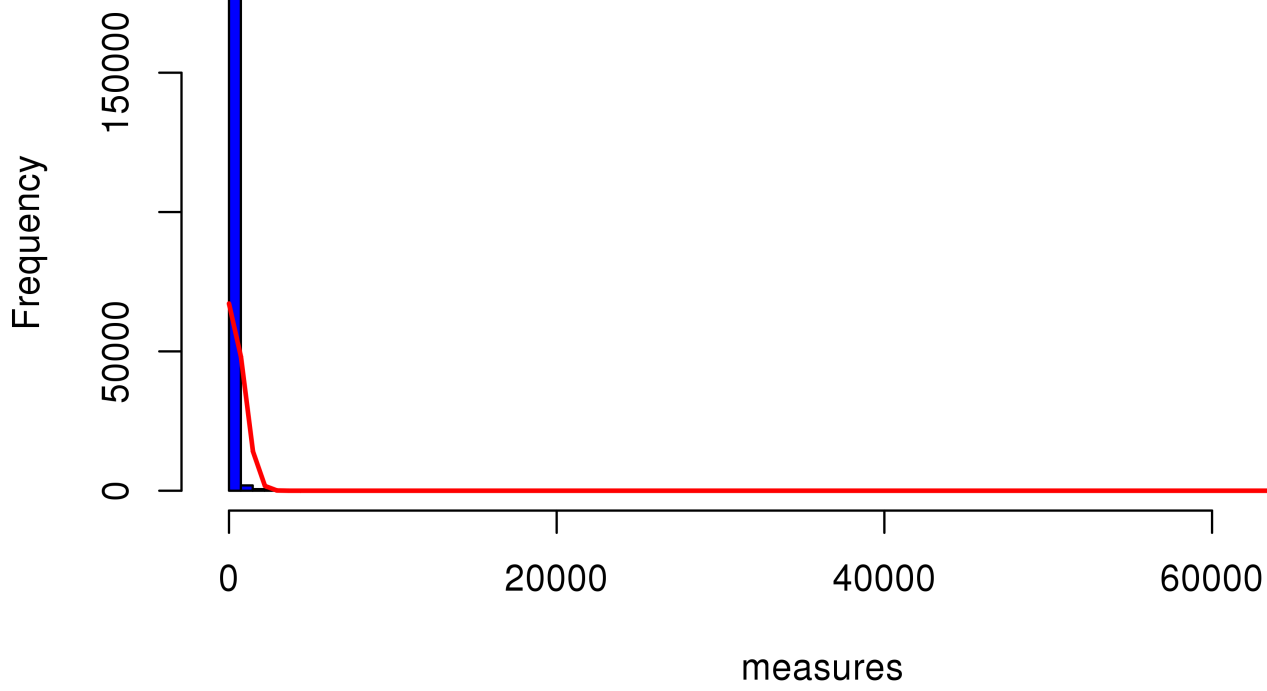

### Normal Q-Q Plot

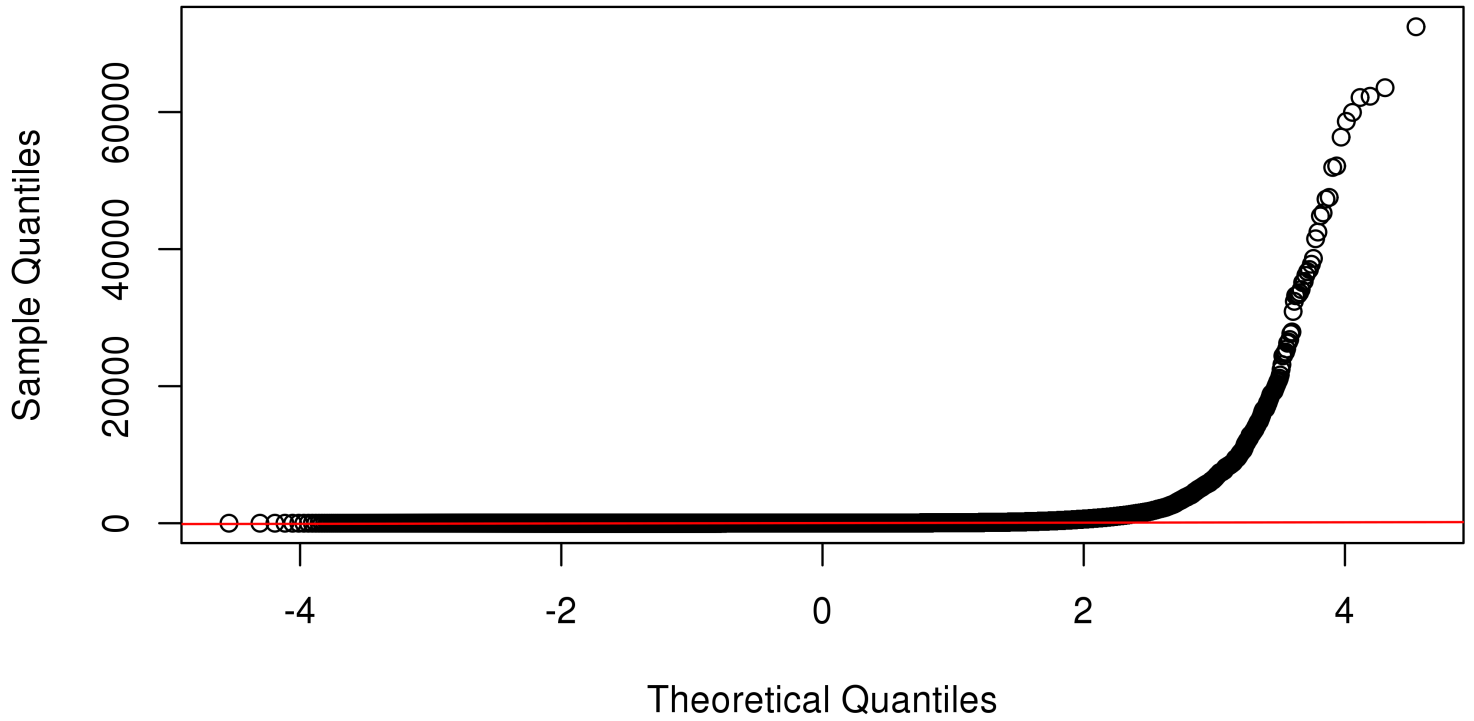

Supplement: 12918_2016_298_MOESM1_ESM.pdf [file 12918_2016_298_MOESM1_ESM.pdf]
